# Supplementary material for: Balanced π–π interactions directing the self-assembly of indolocarbazole-based low molecular mass organogelators
Source: Royal Society of Chemistry journal article supplement (doi:10.1039/c4ob00873a), 2014-01-01
Supplement: c4ob00873a1.pdf [file c4ob00873a1.pdf]

Supplementary Material (ESI) for Organic & Biomolecular  
Chemistry This journal is © The Royal Society of Chemistry  
2011

## Balanced $\pi$ - $\pi$ interaction directing the self-assembly of indolocarbazoles-based low molecular mass organic gelators

Peng Gong, Pengchong Xue, Chong Qian, Zhenqi Zhang, Ran Lu\*

State Key Laboratory of Supramolecular Structure

and Materials, College of Chemistry, Jilin University,

Changchun 130012, P. R. China

Tel: + 86-431-88499179, E-

mail: [luran@mail.jlu.edu.cn](mailto:luran@mail.jlu.edu.cn)

### Supporting Information

#### Contents:

|                                                                |    |
|----------------------------------------------------------------|----|
| 1. Photophysical data of <b>4-9</b>                            | S2 |
| 2. The optimized molecular structures of <b>8</b> and <b>9</b> | S3 |
| 3. Cyclic voltammetry curve of compound <b>7-9</b>             | S4 |
| 4. The optimized configurations for compounds <b>4-9</b>       | S5 |
| 5. NMR spectra and the mass spectrometry data of the products  | S7 |

**Table S1.** Photophysical data of **4-9**

| Compounds | Solutions <sup>a</sup>                   |                                         |                              |
|-----------|------------------------------------------|-----------------------------------------|------------------------------|
|           | $\lambda_{\text{max}}^{\text{abs}}$ (nm) | $\lambda_{\text{max}}^{\text{em}}$ (nm) | $\Phi_{\text{f}}^{\text{b}}$ |
| <b>4</b>  | 274, 298, 345, 362                       | 367, 386,406                            | 0.44                         |
| <b>5</b>  | 254, 278, 296, 352, 370, 388             | 412, 435, 460(shoulder)                 | 0.39                         |
| <b>6</b>  | 289, 321, 371, 389                       | 400, 418(shoulder)                      | 0.66                         |
| <b>7</b>  | 279, 302, 352, 369                       | 384, 403, 423                           | 0.69                         |
| <b>8</b>  | 260, 279, 301, 355, 377, 395             | 420,445, 474(shoulder)                  | 0.38                         |
| <b>9</b>  | 296, 319, 351, 392                       | 403,425(shoulder)                       | 0.45                         |

a: in THF (5  $\mu\text{M}$ ); b: Using quinine sulfate in 0.1  $\text{H}_2\text{SO}_4$  ( $\Phi_{\text{f}} = 0.546$ ) as the standard.

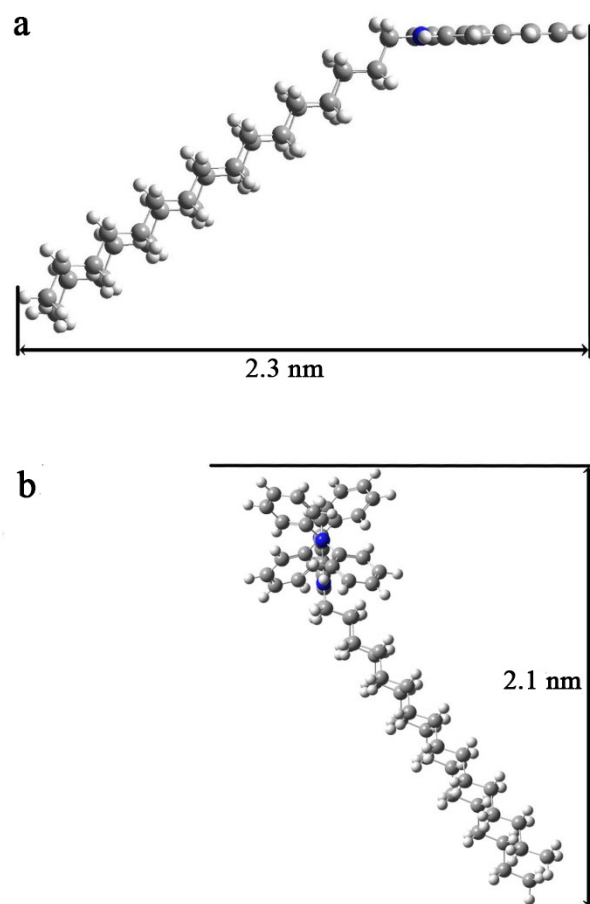

**Figure S1** The optimized molecular structures of **8** (a) and **9** (b) calculated by semi-empirical quantum mechanical method (AM1 force field).

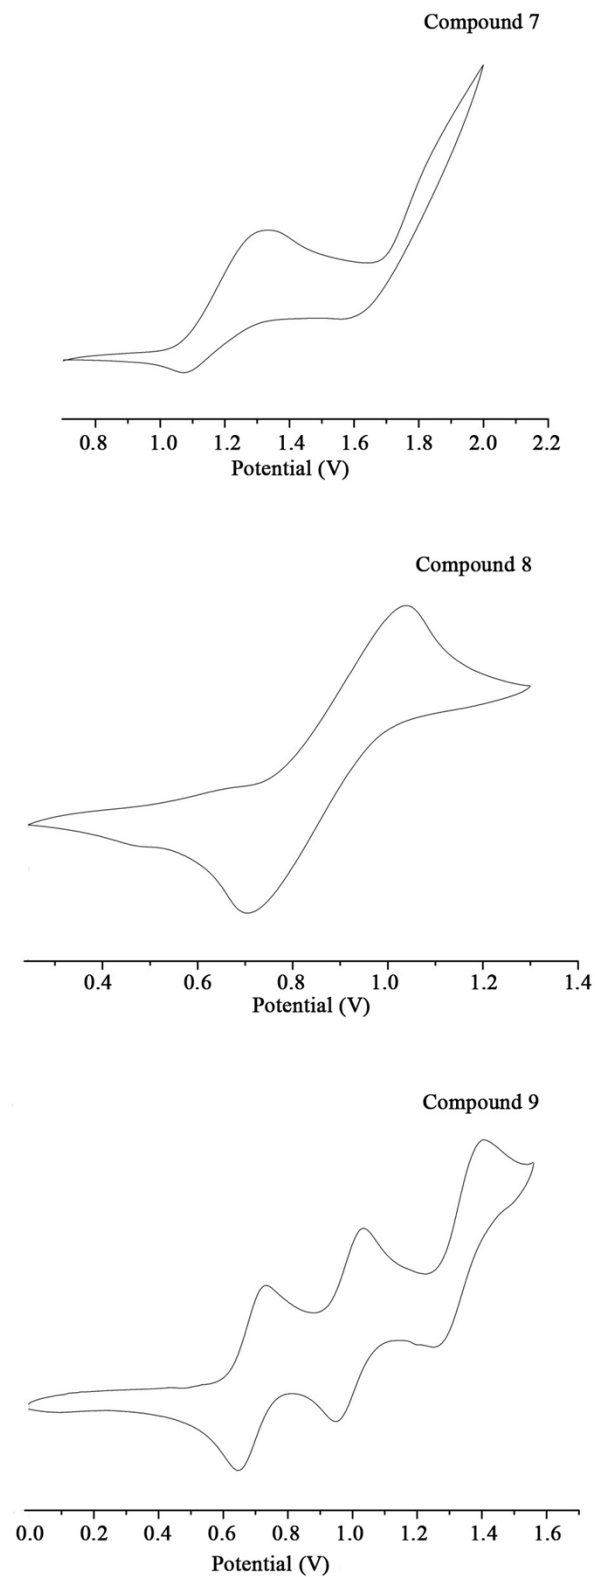

**Figure S2** Cyclic voltammetry diagrams of compounds **7-9** in anhydrous  $\text{CH}_2\text{Cl}_2$  with 0.1 M  $\text{Bu}_4\text{NBF}_4$  as

electrolyte at a scan rate of  $50 \text{ mV}\cdot\text{s}^{-1}$

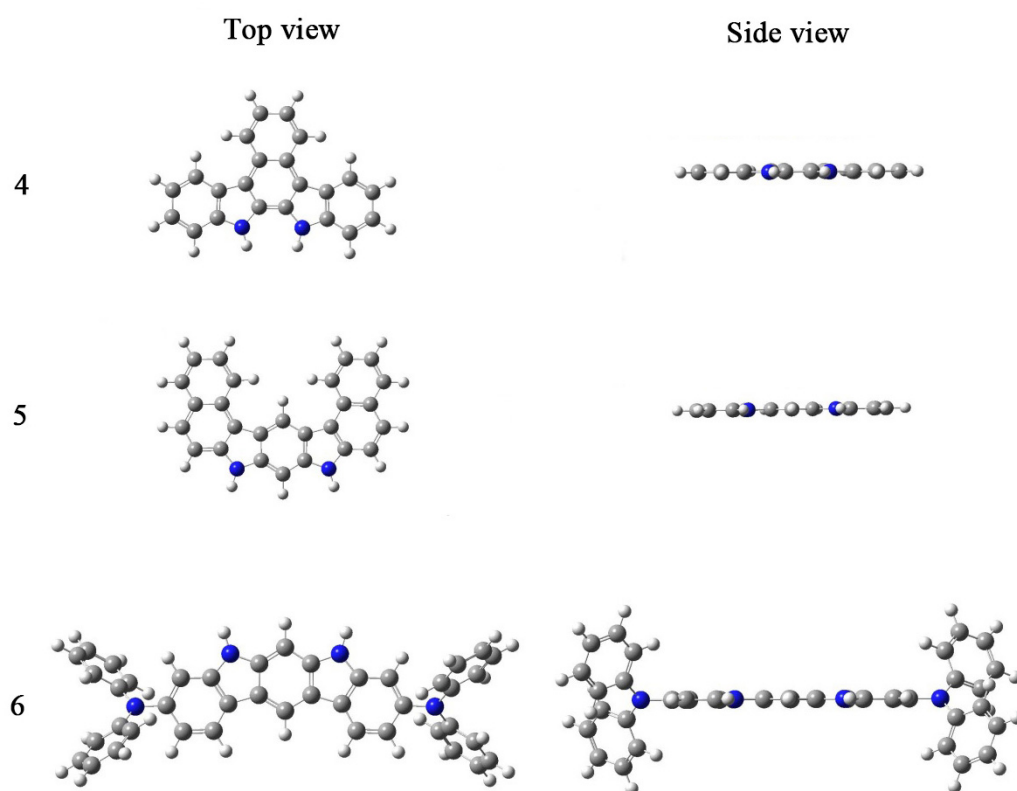

**Figure S3** The optimized configurations for compounds 4, 5, 6 calculated by the B3LYP/6-31G method on Gaussian 09w software.

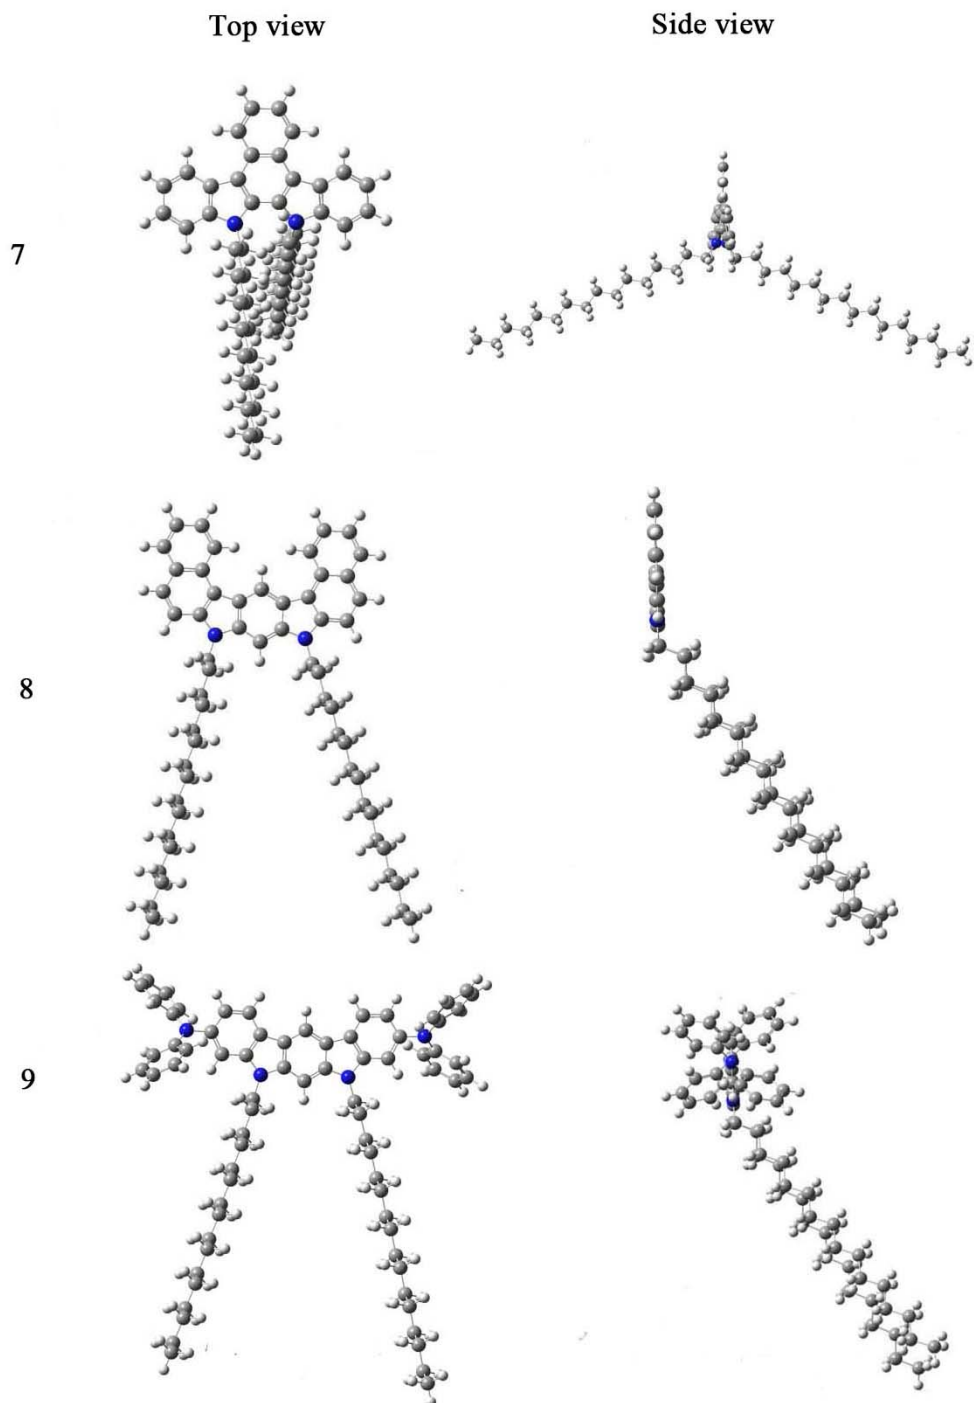

**Figure S4** The optimized configurations for compounds **7**, **8**, **9** calculated by the B3LYP/6-31G method on Gaussian 09w software.

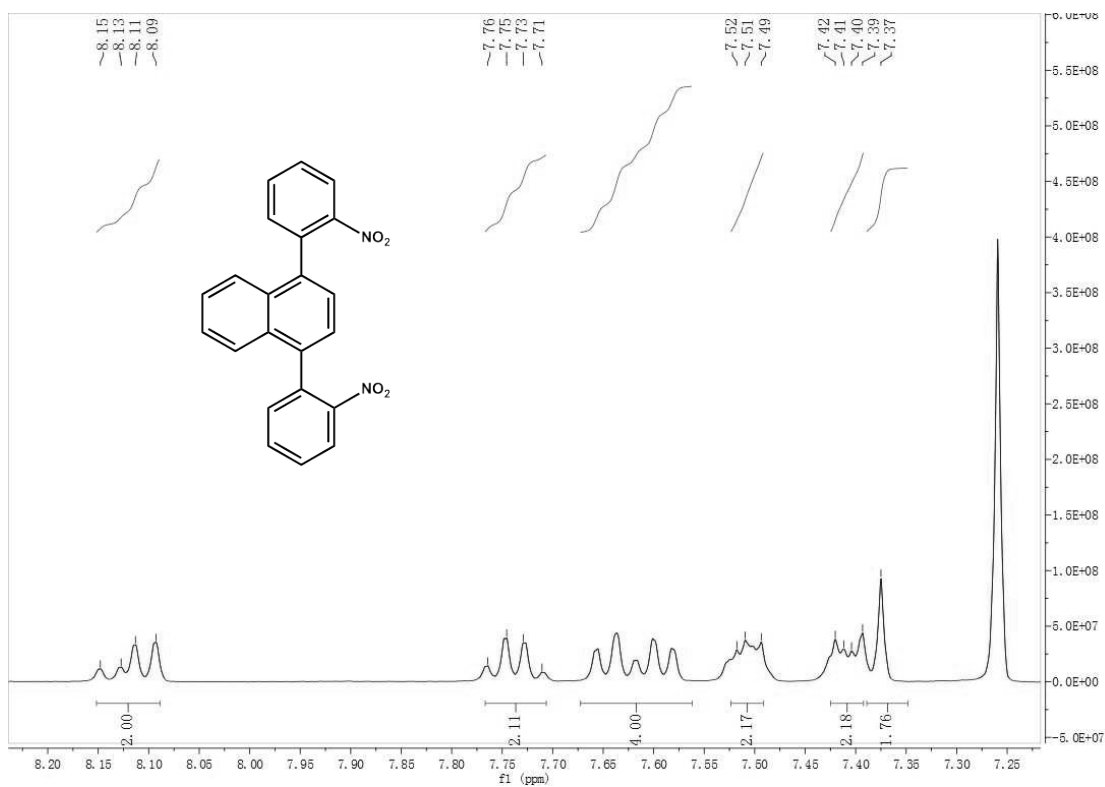

Figure S5  $^1\text{H}$  NMR (400 MHz,  $\text{CDCl}_3$ ) spectrum of compound **1**.

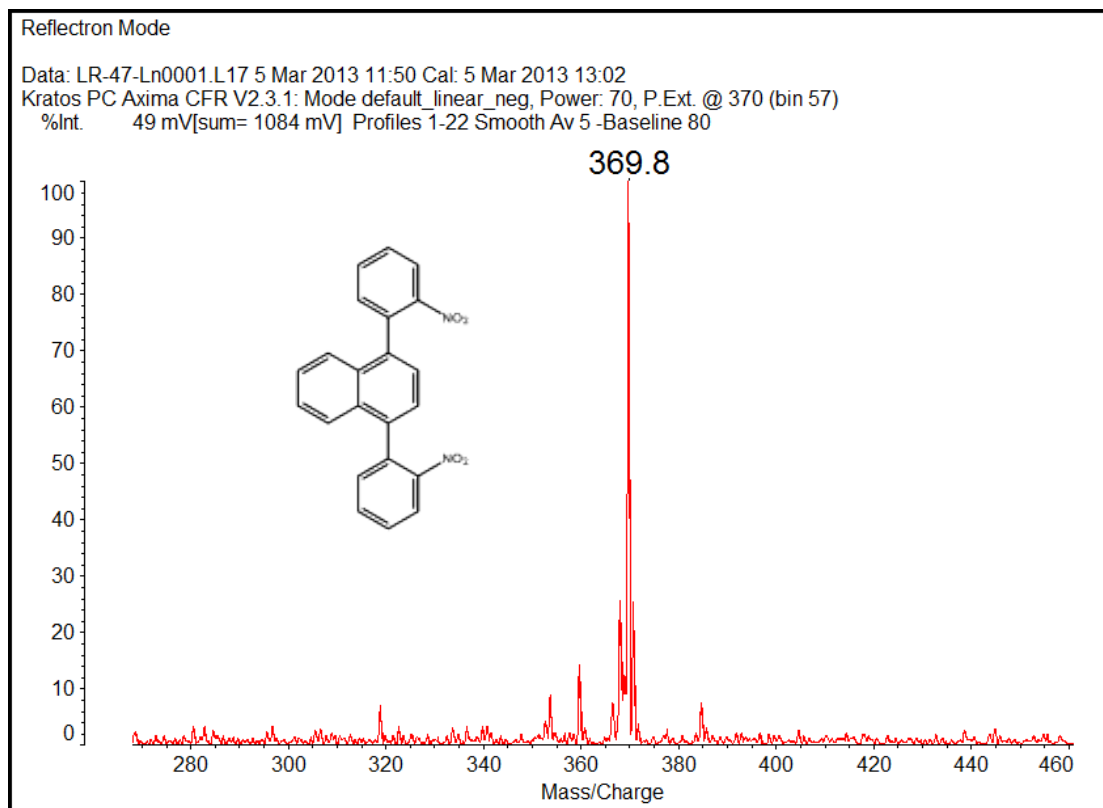

Figure S6 MALDI/TOF MS spectrum of compound **1**.

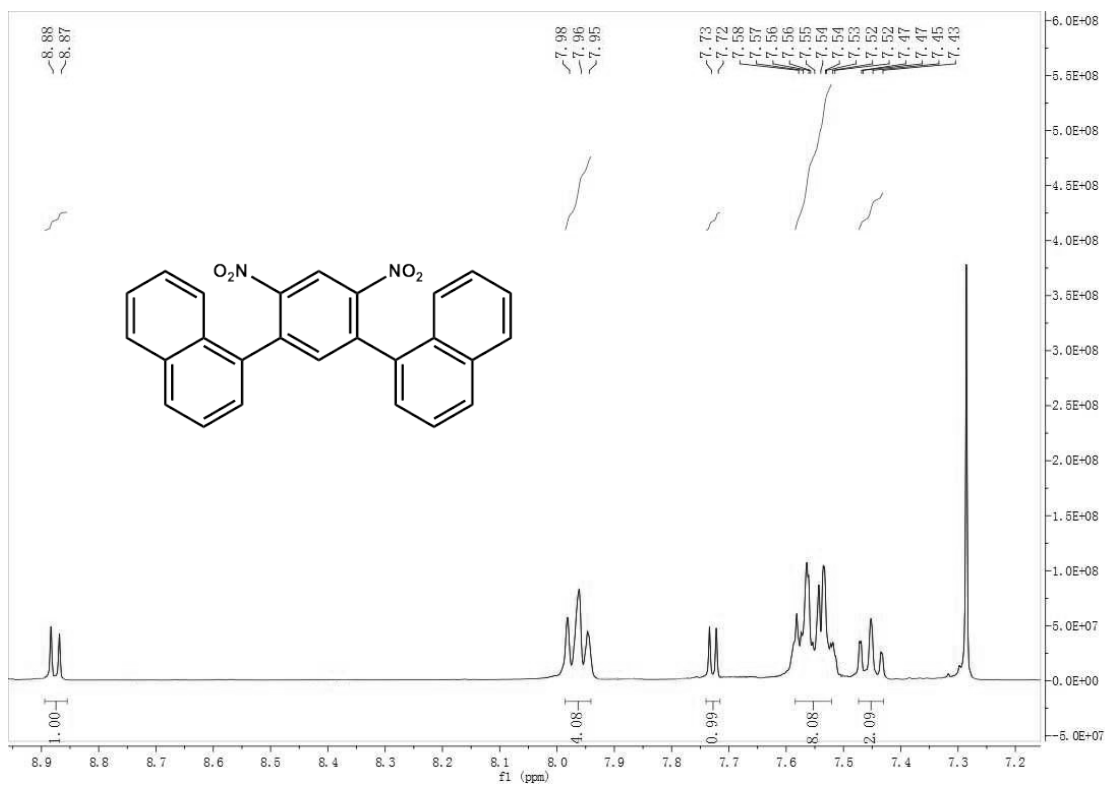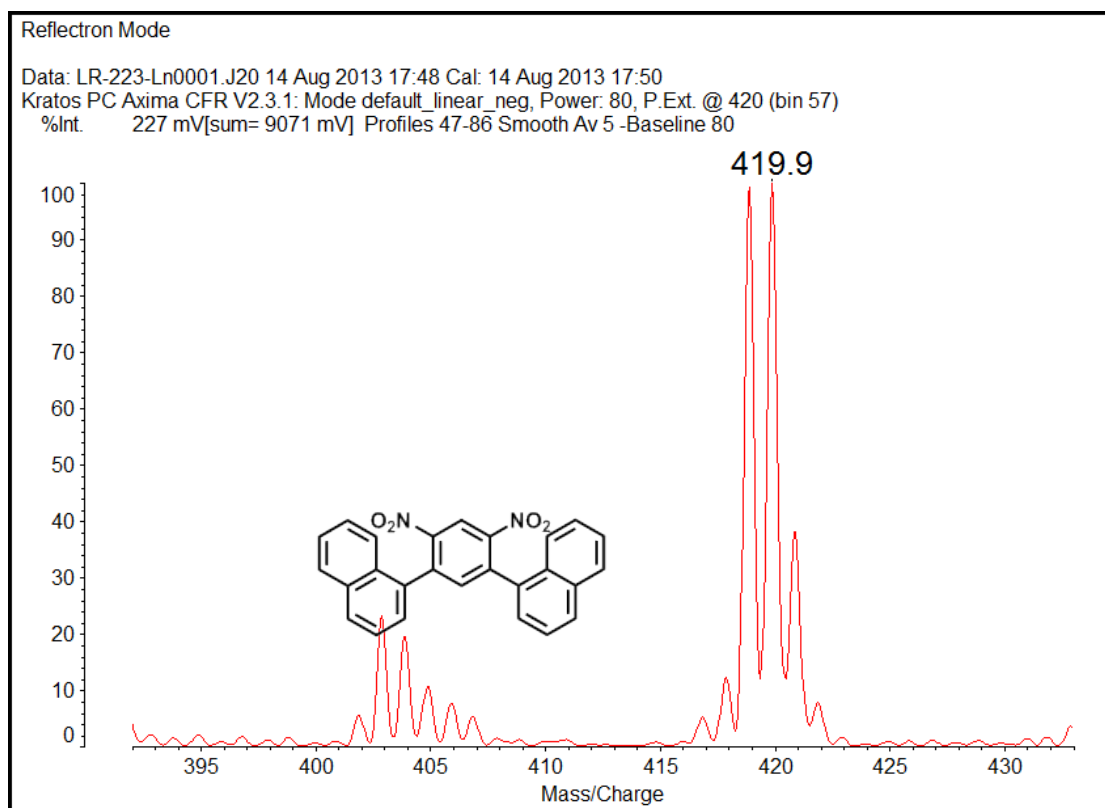



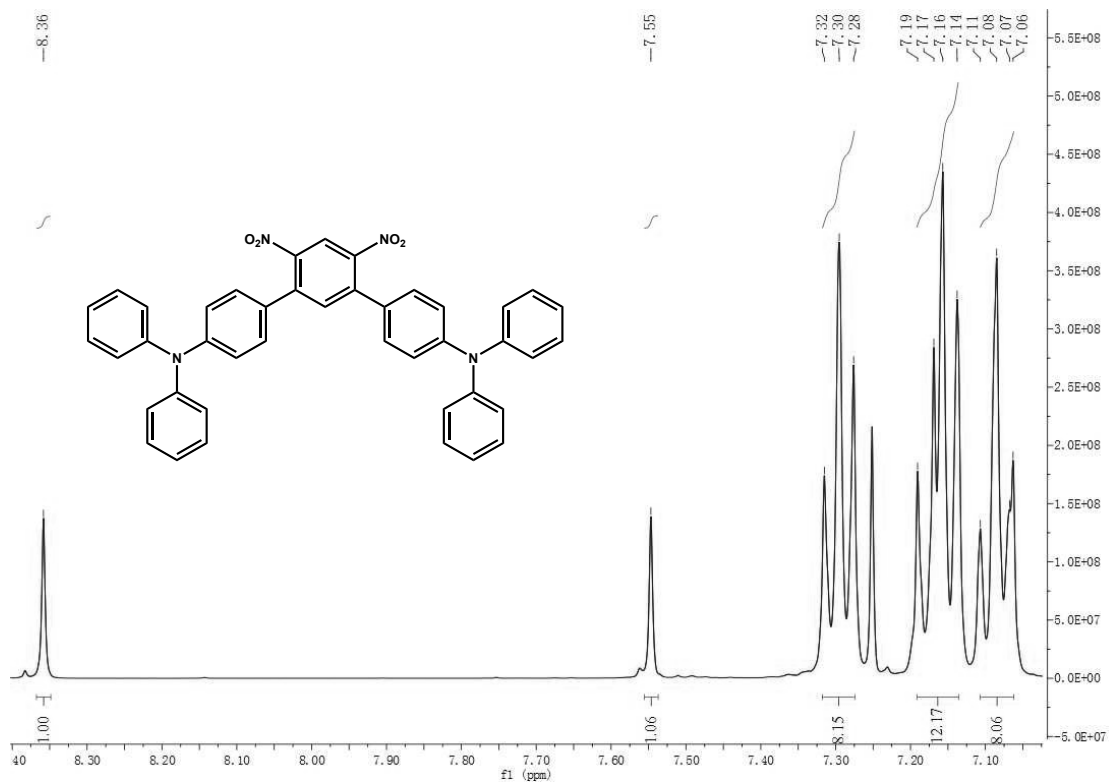

Figure S9  $^1\text{H}$  NMR (400 MHz,  $\text{CDCl}_3$ ) spectrum of compound 3.

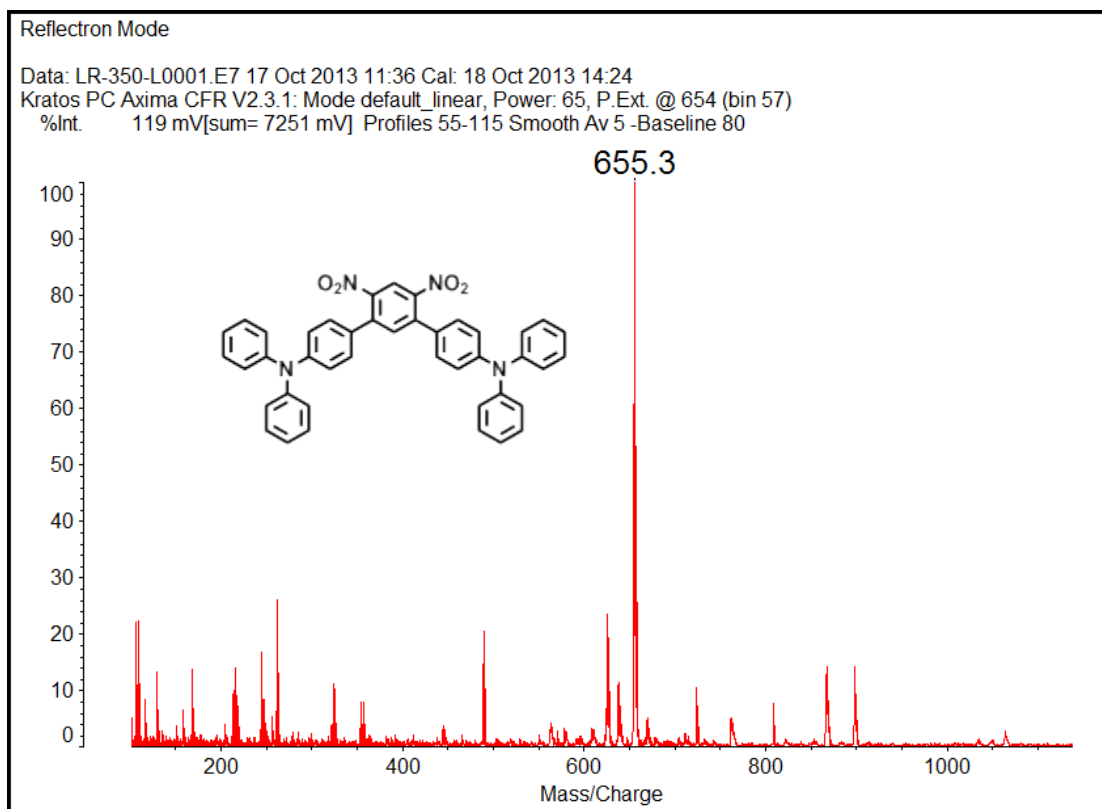

Figure S10 MALDI/TOF MS spectrum of compound 3.

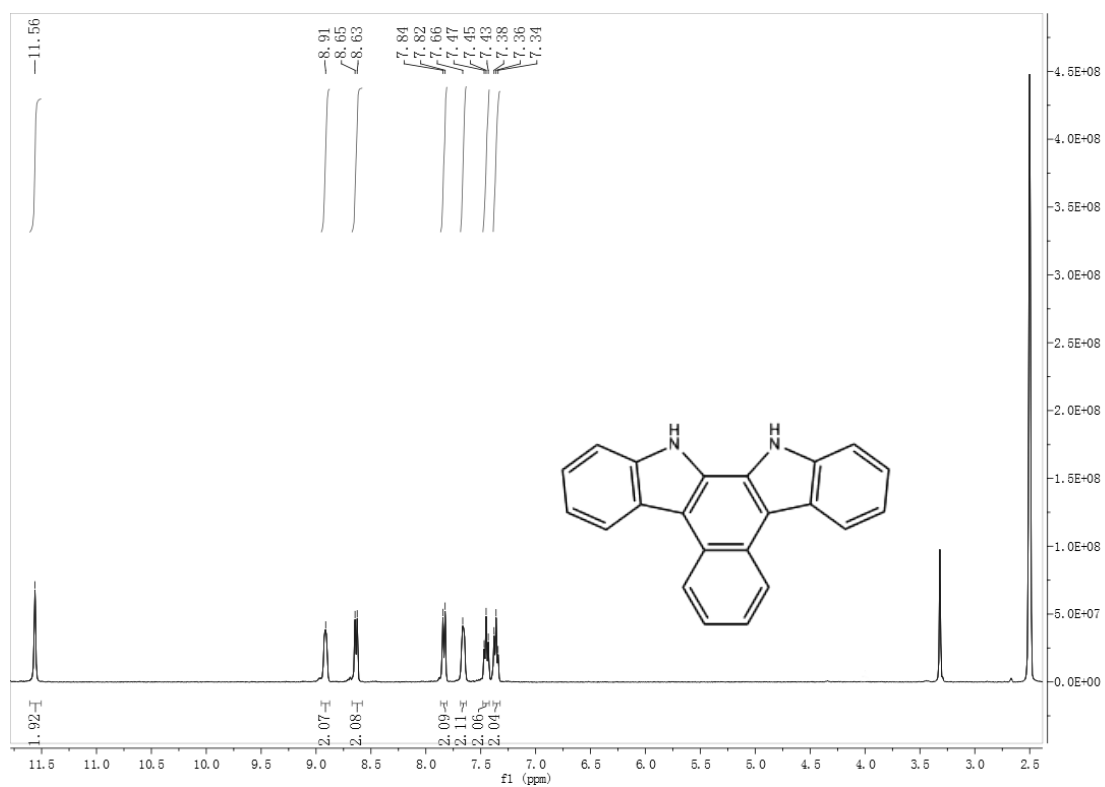

**Figure S11**  $^1\text{H}$  NMR (400 MHz, DMSO- $d_6$ ) spectrum of compound 4.

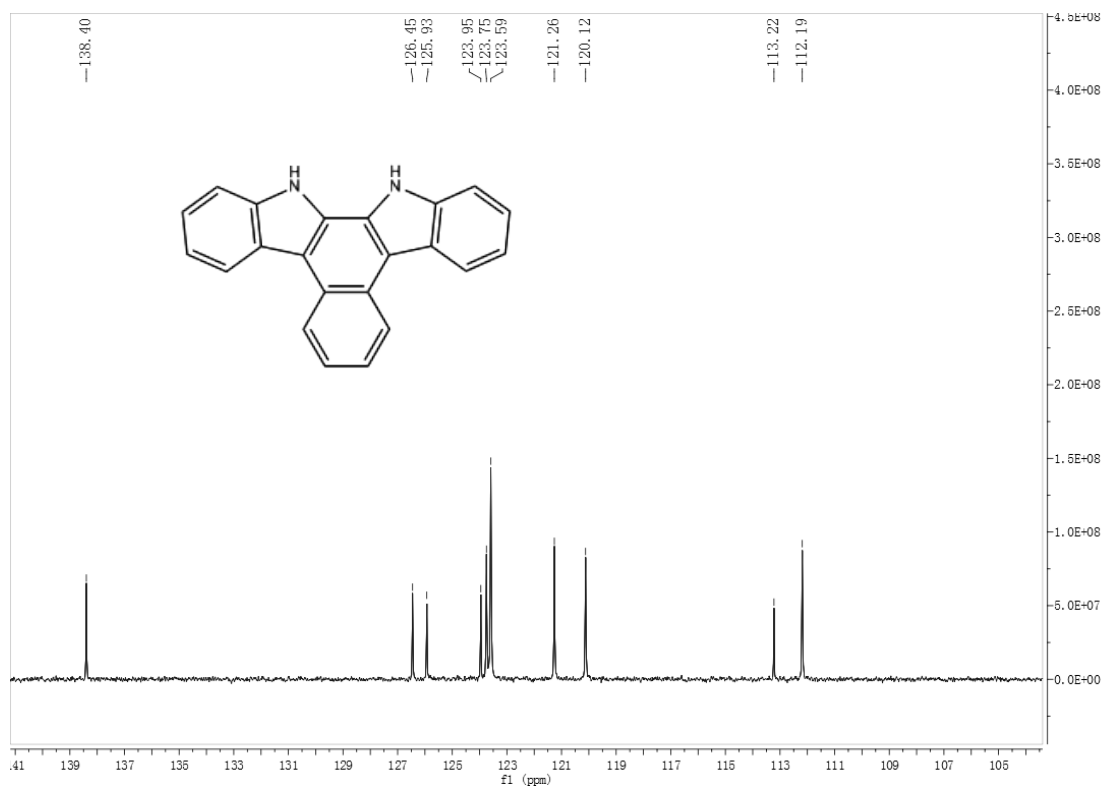

**Figure S12**  $^{13}\text{C}$  NMR (100 MHz, DMSO- $d_6$ ) spectrum of compound 4.

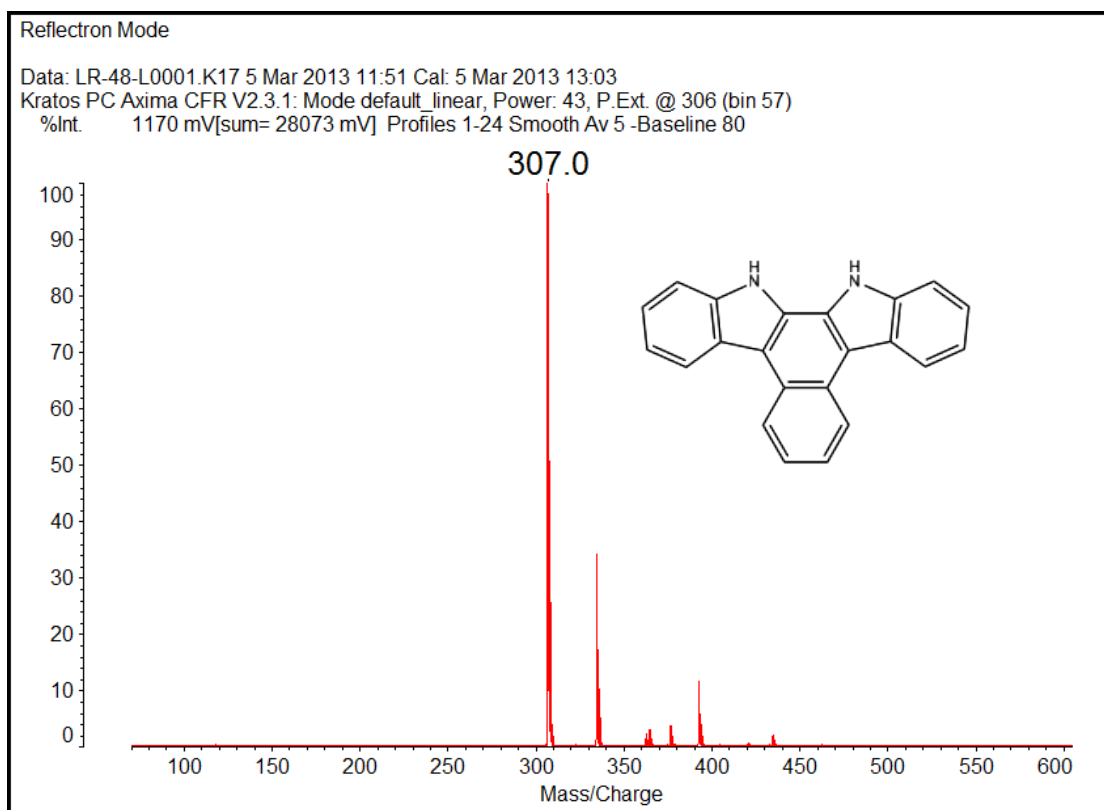

Figure S13 MALDI/TOF MS spectrum of compound 4.

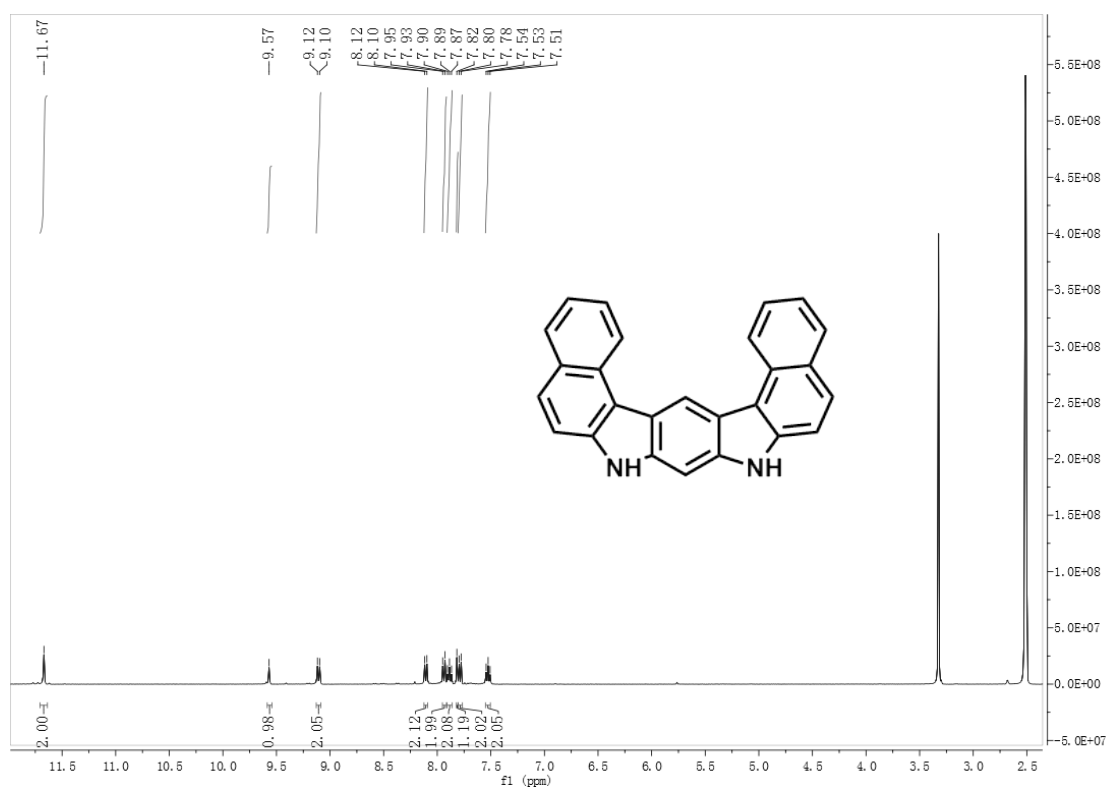

Figure S14  $^1\text{H}$  NMR (400 MHz, DMSO- $d_6$ ) spectrum of compound 5.

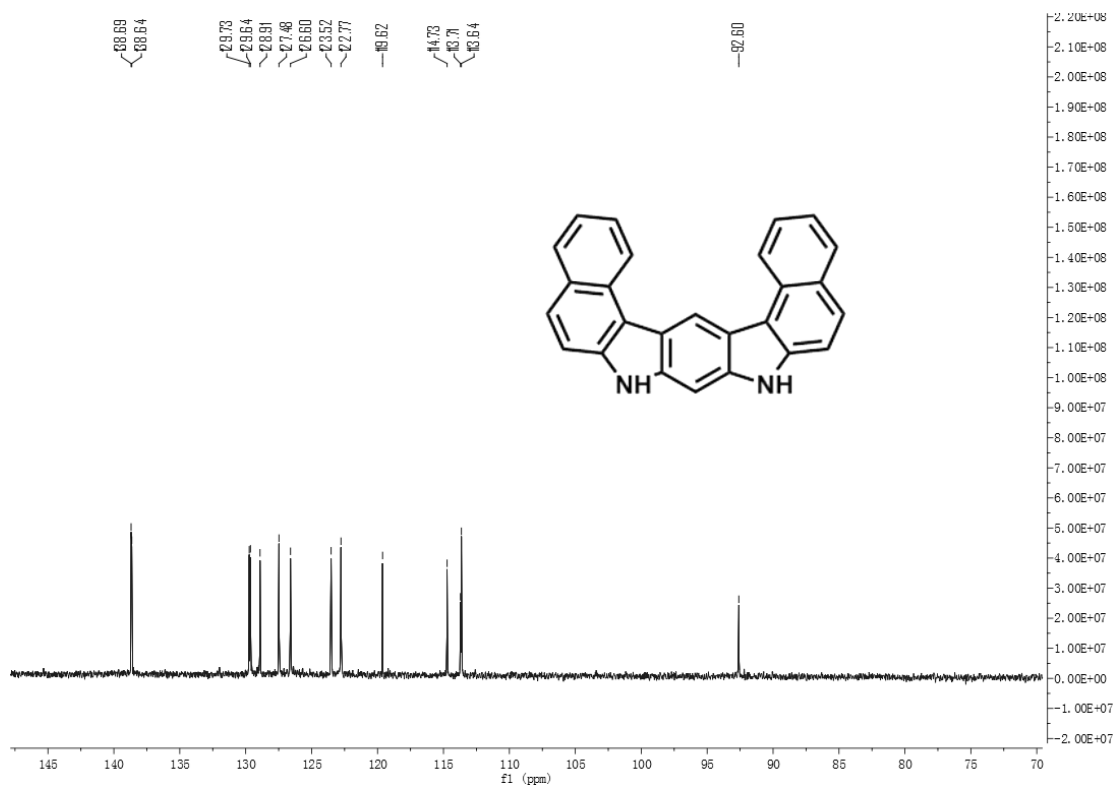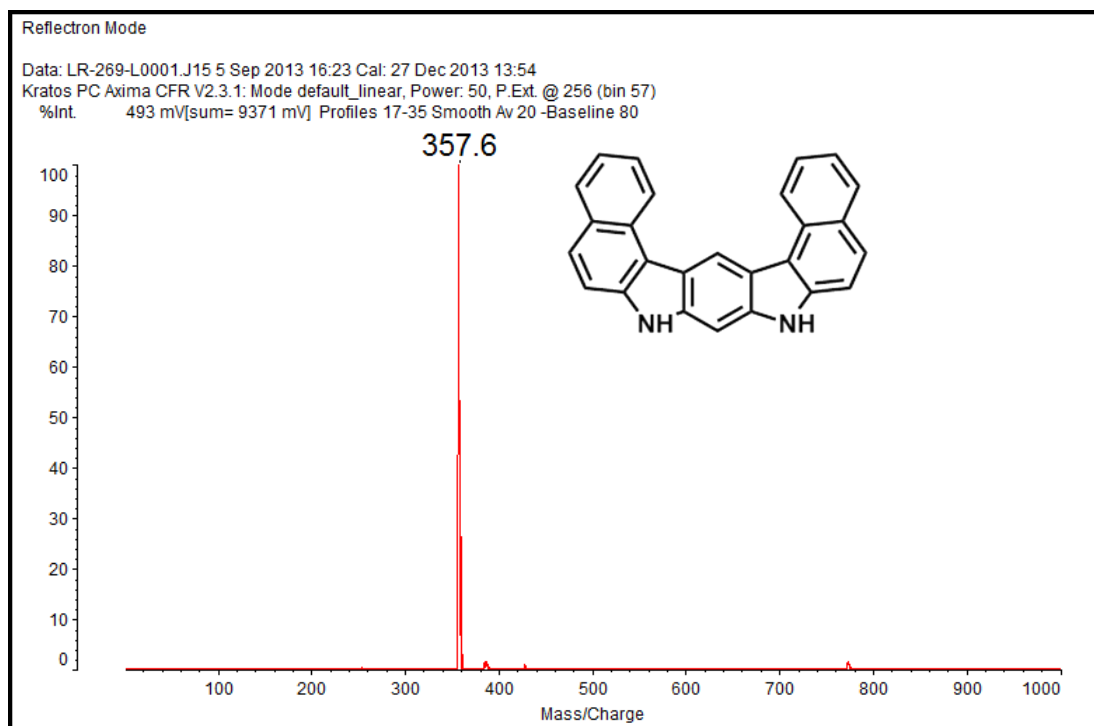

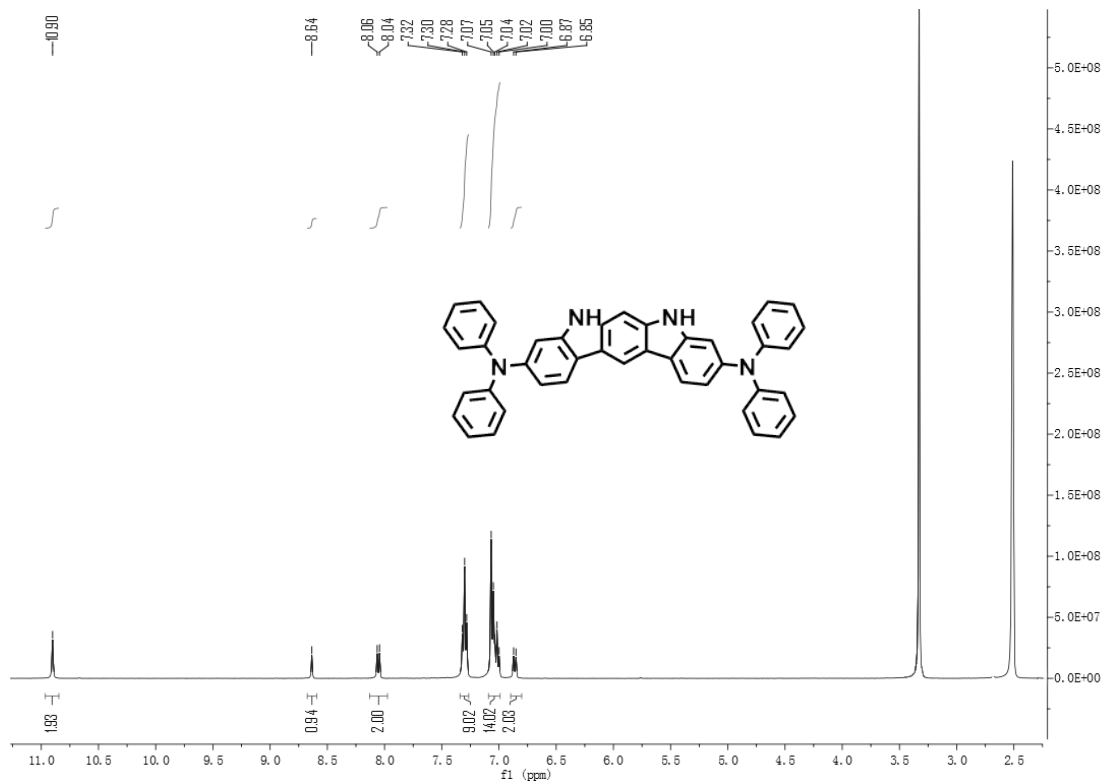

Figure S17  $^1\text{H}$  NMR (400 MHz, DMSO- $d_6$ ) spectrum of compound 6.

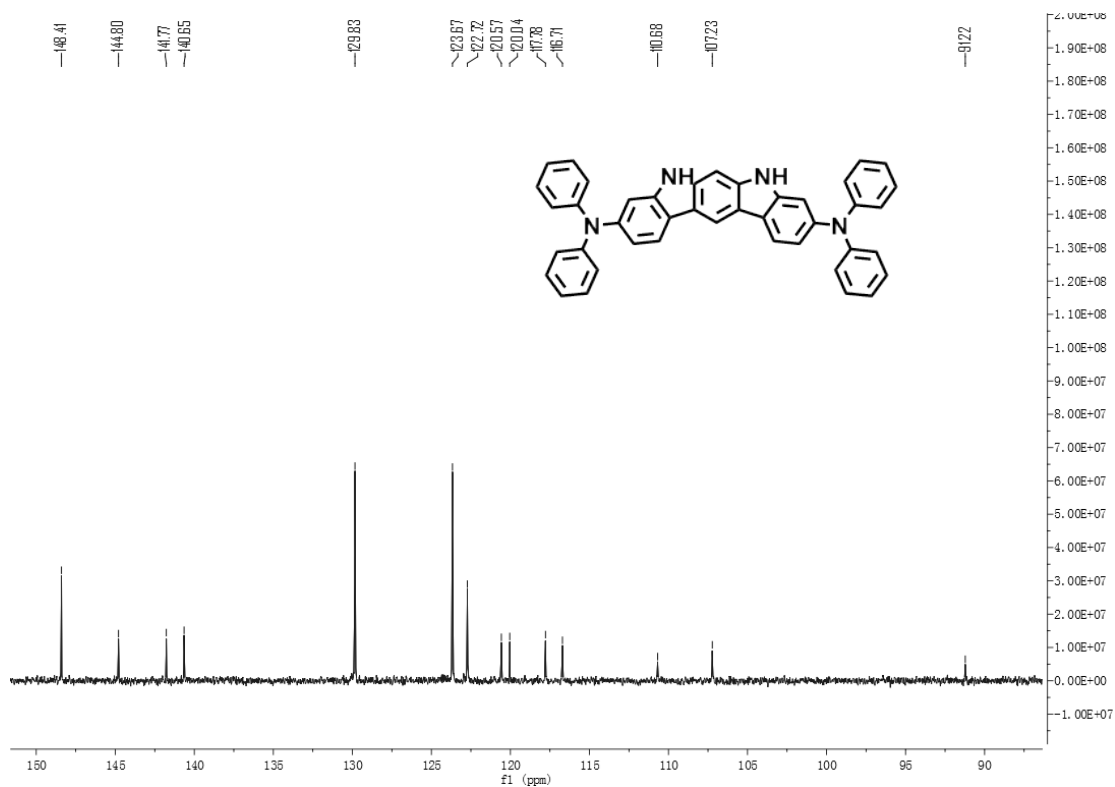

Figure S18  $^{13}\text{C}$  NMR (100 MHz, DMSO- $d_6$ ) spectrum of compound 6.

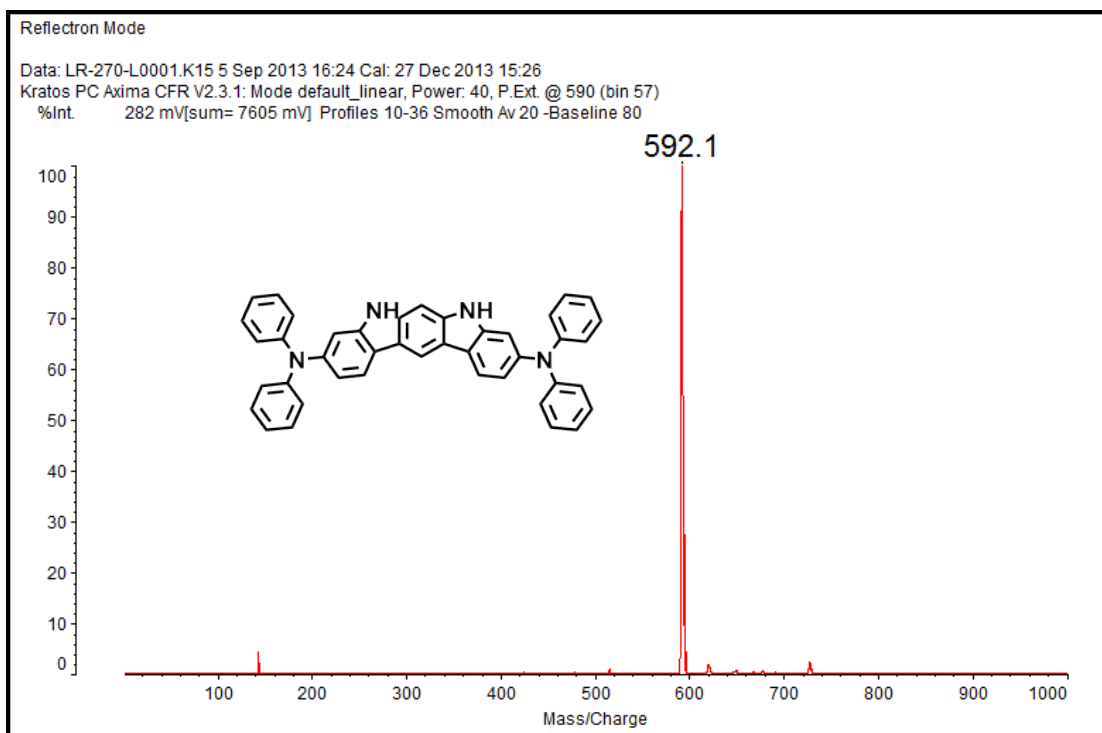

Figure S19 MALDI/TOF MS spectrum of compound 6.

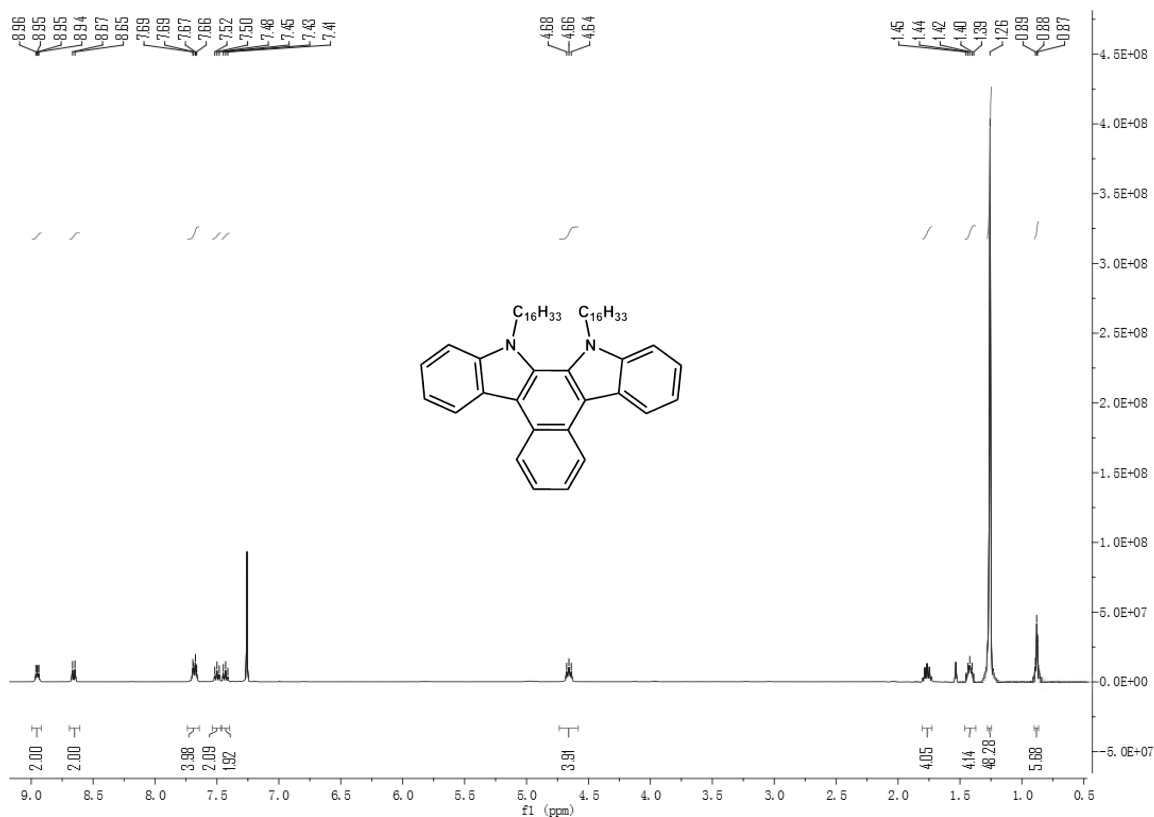

Figure S20  $^1\text{H}$  NMR (400 MHz,  $\text{CDCl}_3$ ) spectrum of compound 7.

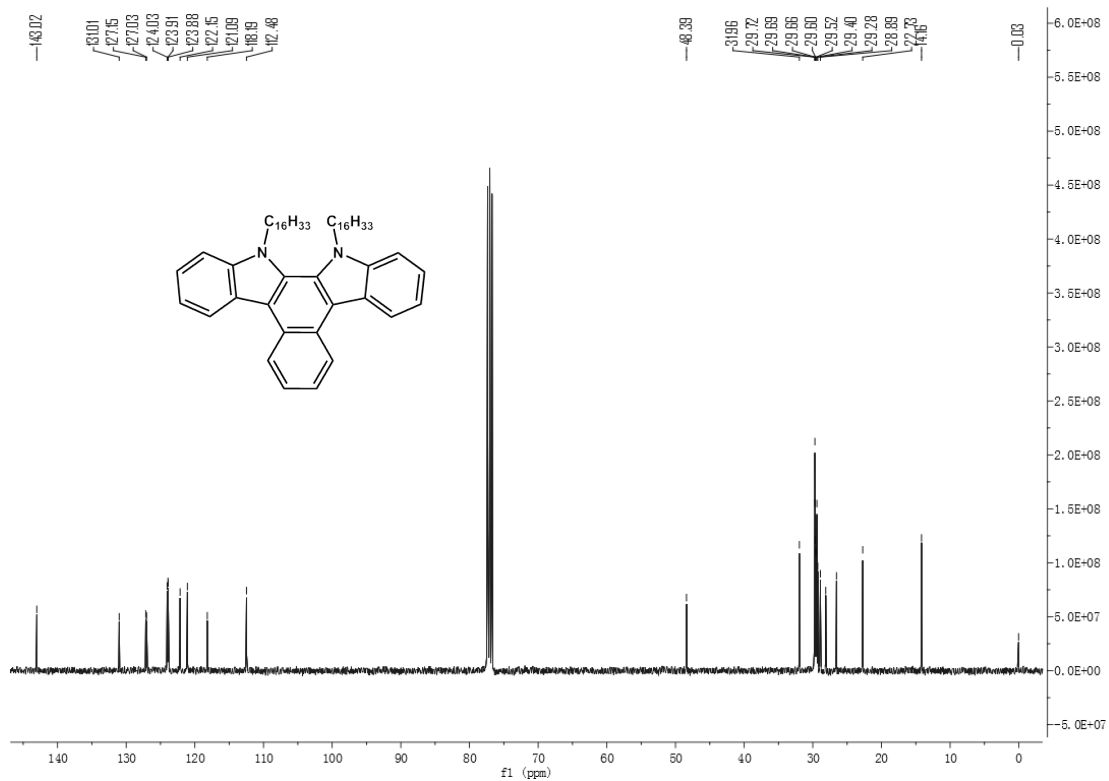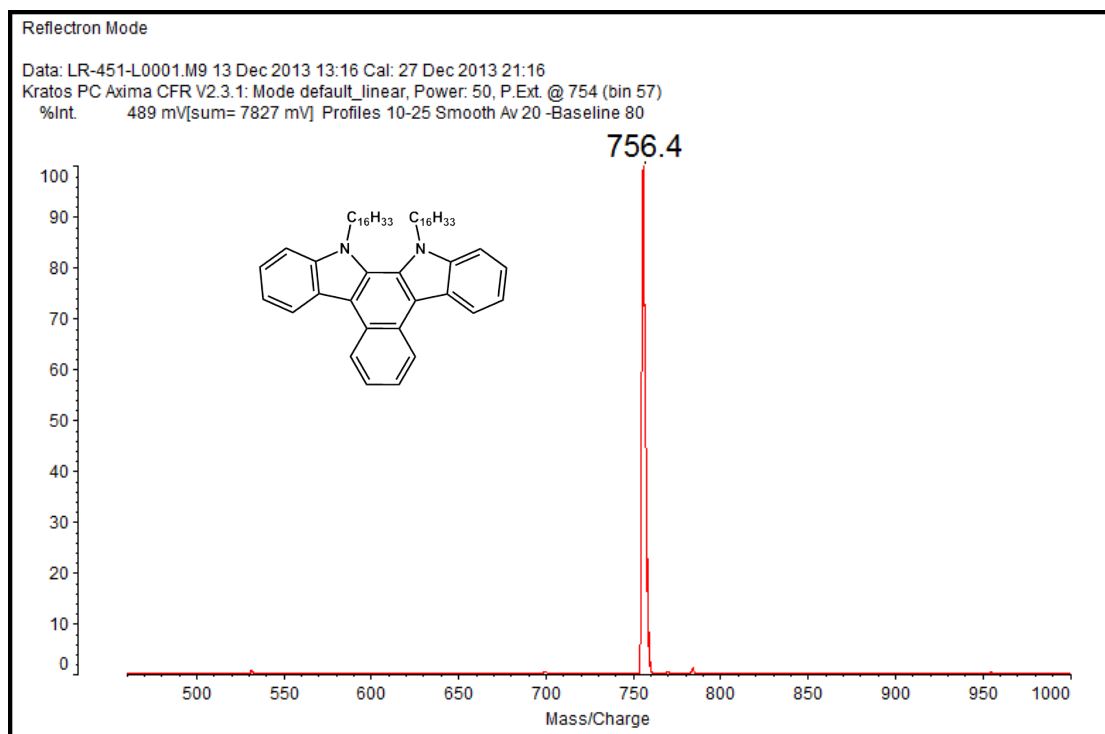

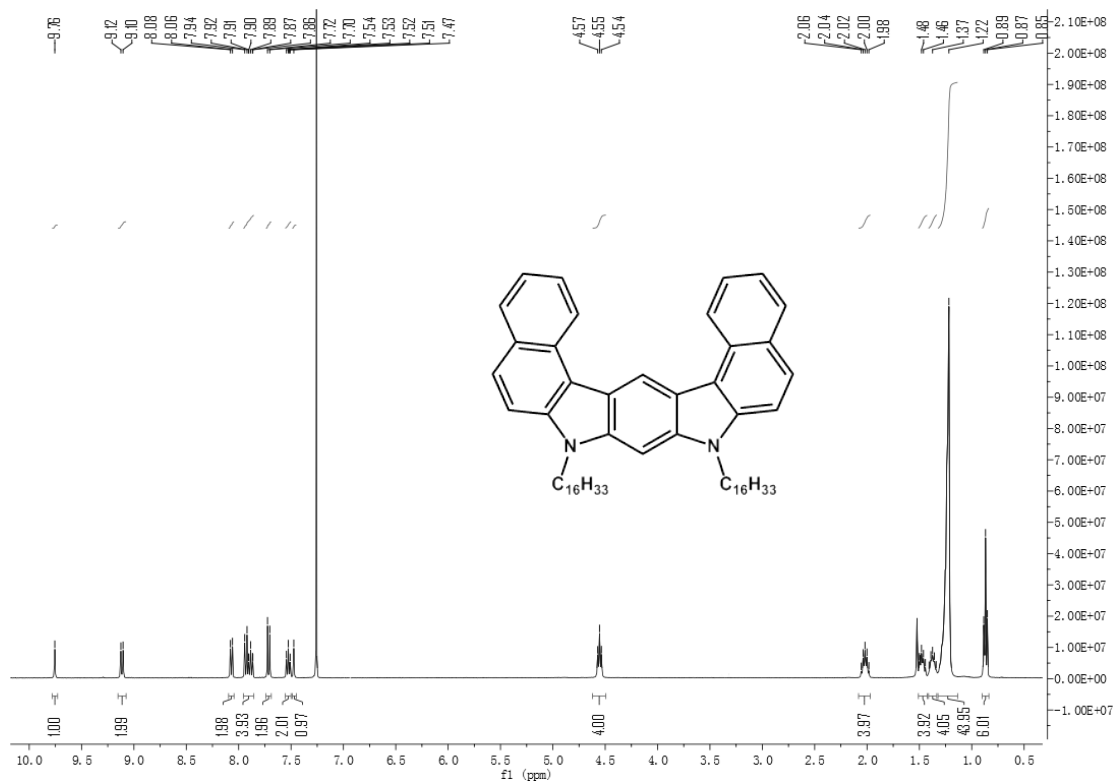

Figure S23  $^1\text{H}$  NMR (400 MHz,  $\text{CDCl}_3$ ) spectrum of compound 8.

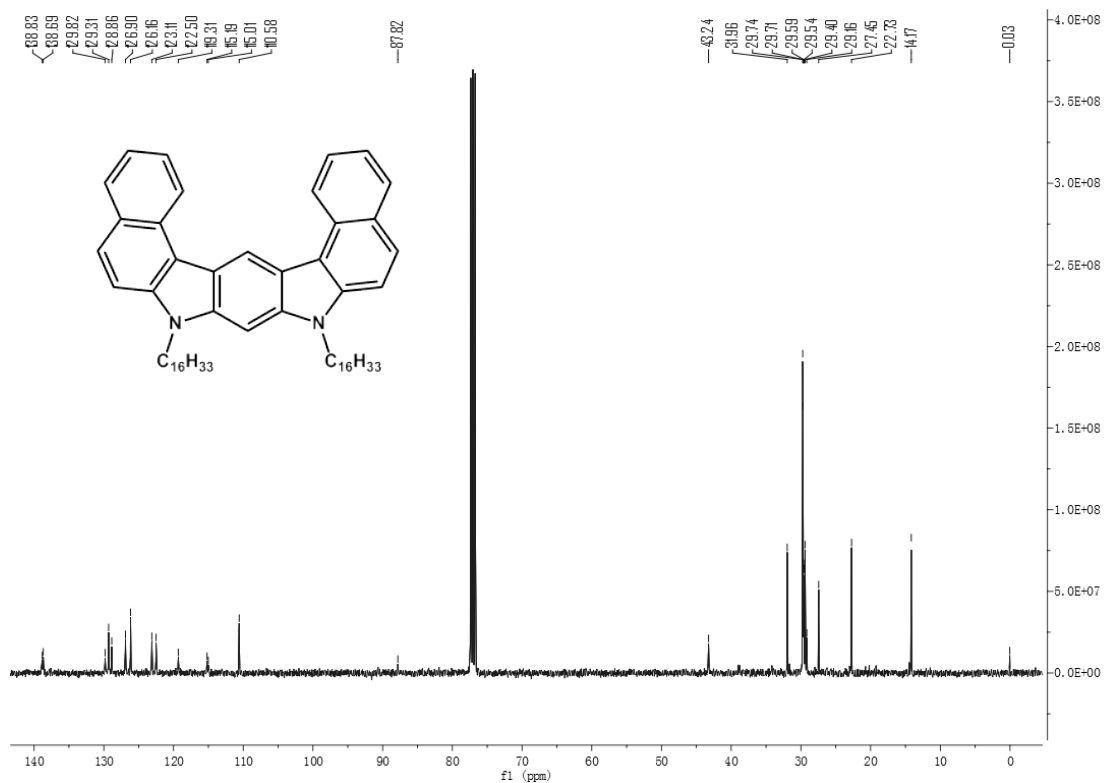

Figure S24  $^{13}\text{C}$  NMR (100 MHz,  $\text{CDCl}_3$ ) spectrum of compound 8.



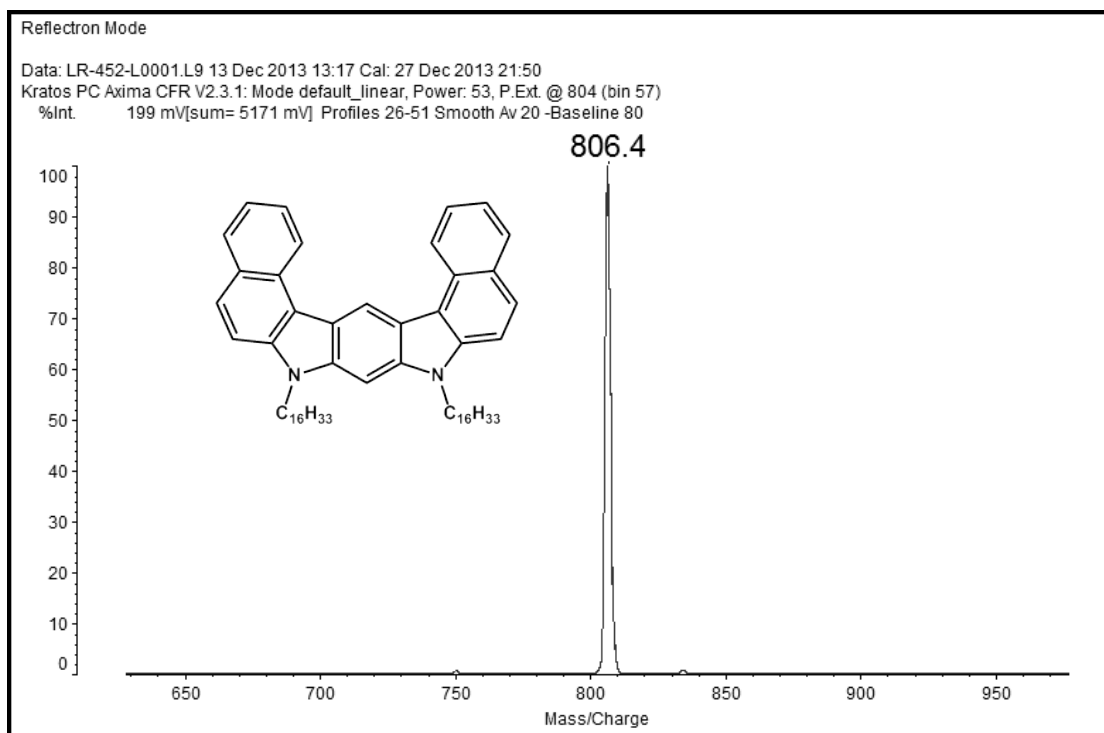

Figure S25 MALDI/TOF MS spectrum of compound 8.

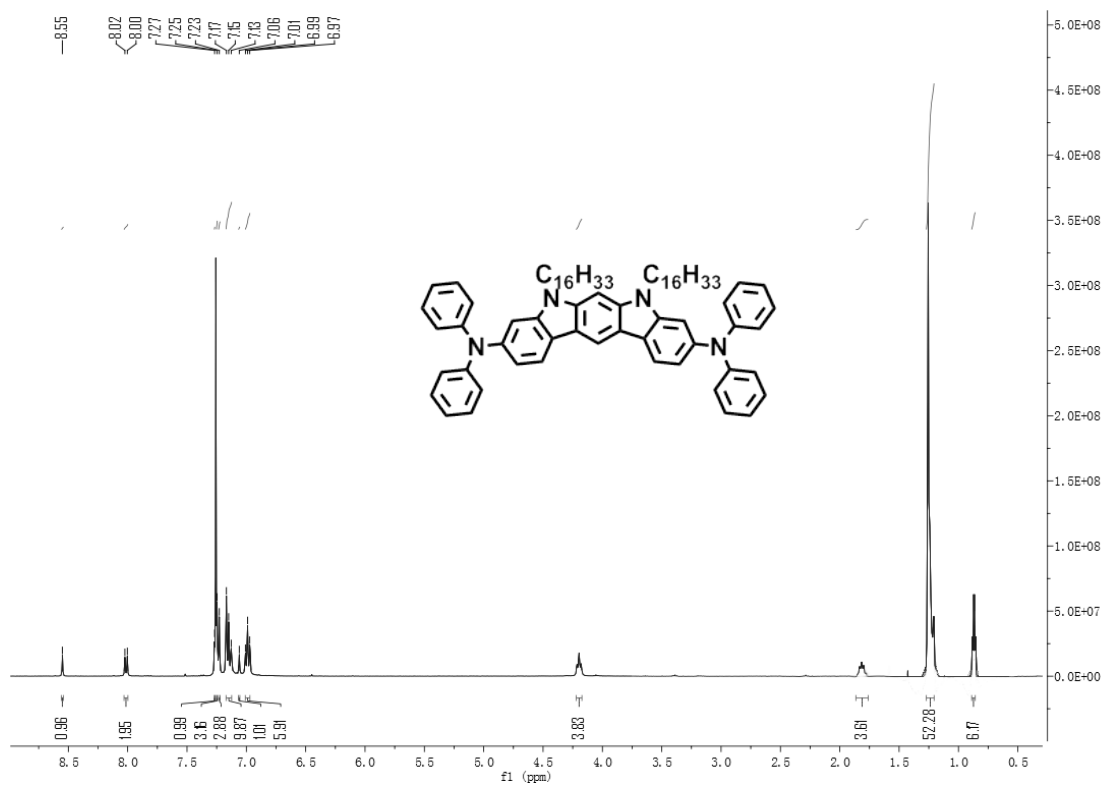

Figure S26  $^1\text{H}$  NMR (400 MHz,  $\text{CDCl}_3$ ) spectrum of compound 9.

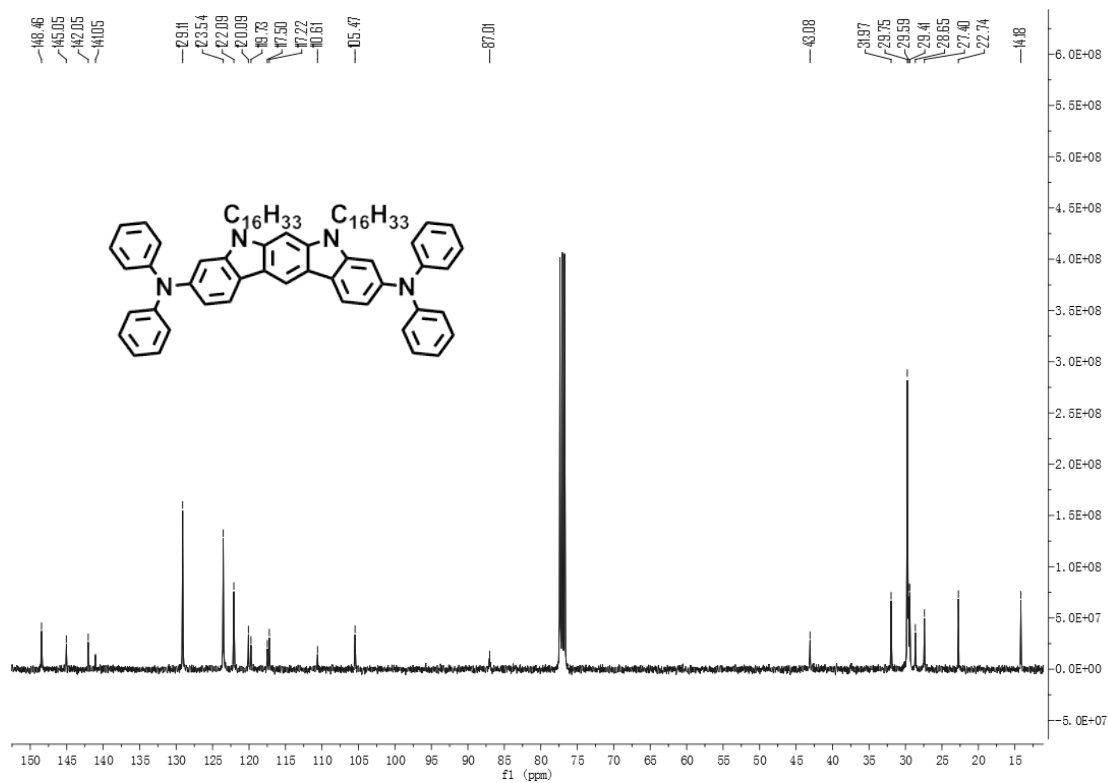

Figure S27 <sup>13</sup>C NMR (100 MHz, CDCl<sub>3</sub>) spectrum of compound 9.

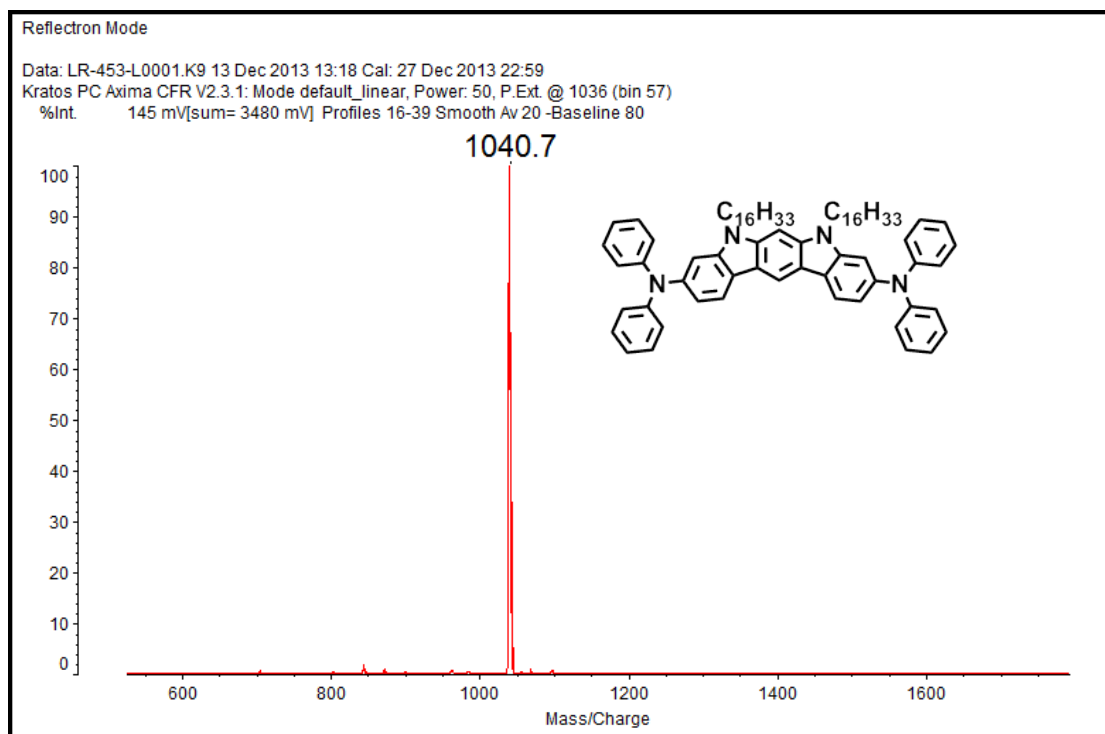

Figure S28 MALDI/TOF MS spectrum of compound 9.
